# Supplementary material
Source: Springer Nature journal article supplement (https://www.springermedizin.de/resource/supplementary/13756_2013_570_MOESM1_ESM.pdf/9683392)

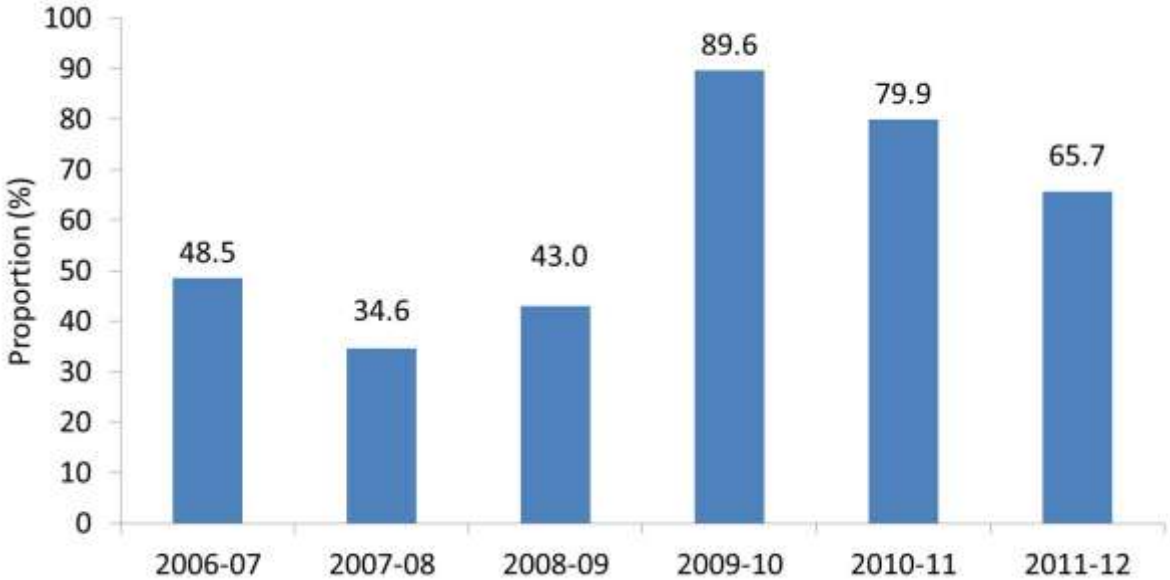

Supplement: MOESM1 [file 9683392]
